# Supplementary material for: The multidimensional scale of subjective well-being of employed persons (MSWEP): validity and reliability
Source: Research Square preprint supplement (doi:10.21203/rs.3.rs-6838962/v1), 2025-07-17
Supplement: Supplementary file 1 [file 036e3d7d29098b380c2bb6e3.docx]

***Multidimensional scale of subjective well-being for employed persons (MSWEP)***

**This document includes the following information:**

1. Instructions for completing the questionnaire.

2. Questionnaire items.

**Survey guidelines:**

3. Evaluation of the survey results.

4. Factor definitions.

5. Item grouping according to the factors.

**PLEASE READ THE QUESTIONNAIRE INSTRUCTIONS FIRST**

The questionnaire contains statements about how people tend to feel in their day-to-day life at the workplace. Please tick one answer per line. Read each statement/question and rate how much you agree or disagree with each statement.

**Please indicate the extent to which you agree or disagree with the statements about your personal experience at work**

*Tick one answer per line*

| **1**  **Strongly disagree** | **2**  **Disagree** | **3**  **Rather disagree** | **4**  **Rather agree** | **5**  **Agree** | **6**  **Strongly agree** |
| --- | --- | --- | --- | --- | --- |

| 1 | I am generally satisfied with my professional life | 1 | 2 | 3 | 4 | 5 | 6 |
| --- | --- | --- | --- | --- | --- | --- | --- |
| 2 | I trust other people in our organisation | 1 | 2 | 3 | 4 | 5 | 6 |
| 3 | I trust my line manager | 1 | 2 | 3 | 4 | 5 | 6 |
| 4 | I am satisfied with the interpersonal communication at work | 1 | 2 | 3 | 4 | 5 | 6 |
| 5 | My skills match my responsibilities | 1 | 2 | 3 | 4 | 5 | 6 |
| 6 | My work makes a positive contribution to society | 1 | 2 | 3 | 4 | 5 | 6 |
| 7 | My job offers good career opportunities | 1 | 2 | 3 | 4 | 5 | 6 |
| 8 | I am generally satisfied with my work in this organisation | 1 | 2 | 3 | 4 | 5 | 6 |

**Please indicate how often you experience the following in the workplace**

*Tick one answer per line*

| **1**  **At no time** | **2**  **Sometimes** | **3**  **Less than half the time** | **4**  **More than half**  **the time** | **5**  **Most**  **time** | **6**  **All the time** |
| --- | --- | --- | --- | --- | --- |

| 9 | How often do you feel that you are doing useful work? | 1 | 2 | 3 | 4 | 5 | 6 |
| --- | --- | --- | --- | --- | --- | --- | --- |
| 10 | How often does this job give you the feeling of a job well done? | 1 | 2 | 3 | 4 | 5 | 6 |
| 11 | How often do you feel that you are living a fulfilling life? | 1 | 2 | 3 | 4 | 5 | 6 |
| 12 | How often do you feel involved in improving work processes in your organisation/team? | 1 | 2 | 3 | 4 | 5 | 6 |
| 13 | How often do you feel that you can influence decisions that are important for your work? | 1 | 2 | 3 | 4 | 5 | 6 |
| 14 | To what extent do you trust the top management of your organisation? | 1 | 2 | 3 | 4 | 5 | 6 |
| 15 | How often do you feel supported by your colleagues? | 1 | 2 | 3 | 4 | 5 | 6 |
| 16 | How often do you feel supported by your manager? | 1 | 2 | 3 | 4 | 5 | 6 |
| 17 | How often do you learn something new in your work? | 1 | 2 | 3 | 4 | 5 | 6 |
| 18 | How often do you feel your life is in balance (work and personal time)? | 1 | 2 | 3 | 4 | 5 | 6 |
| 19 | How often are you exposed to chemicals at work? | 1 | 2 | 3 | 4 | 5 | 6 |
| 20 | How often are you exposed to noise at work? | 1 | 2 | 3 | 4 | 5 | 6 |
| 21 | How often do you feel emotionally drained by your work? | 1 | 2 | 3 | 4 | 5 | 6 |
| 22 | How often do you feel physically tired at the end of the working day? | 1 | 2 | 3 | 4 | 5 | 6 |
| 23 | How often can you choose your own working methods or change them as you see fit? | 1 | 2 | 3 | 4 | 5 | 6 |
| 24 | How often can you choose or change the order of your tasks? | 1 | 2 | 3 | 4 | 5 | 6 |
| 25 | How often does your job require you to complete tasks under very tight, urgent deadlines? | 1 | 2 | 3 | 4 | 5 | 6 |
| 26 | How often do you have to work fast at high speed? | 1 | 2 | 3 | 4 | 5 | 6 |
| 27 | How often do you receive recognition or praise for a job well done? | 1 | 2 | 3 | 4 | 5 | 6 |

**Please indicate whether you have had any of the following experiences at work in the last year**

*Tick one answer per line*

| **1**  **Yes** | **2**  **No** |
| --- | --- |

| 28 | In the past year, I have received training paid for or provided by my employer | 1 | 2 |
| --- | --- | --- | --- |
| 29 | In the last year, I have received training that improves my future job prospects | 1 | 2 |
| 30 | In the last year, I have received training that has improved my skills | 1 | 2 |

**Please indicate how often you experience the following in the workplace**

*Tick one answer per line*

| **1**  **At no time** | **2**  **Sometimes** | **3**  **Less than half the time** | **4**  **More than half**  **the time** | **5**  **Most**  **time** | **6**  **All the time** |
| --- | --- | --- | --- | --- | --- |

| ***In the last two week...*** | | |  | |  |  | |  | |  | |  | |
| --- | --- | --- | --- | --- | --- | --- | --- | --- | --- | --- | --- | --- | --- |
| 31 | I was happy and in a good mood | 1 | | 2 | | | 3 | | 4 | | 5 | | 6 | |
| 32 | I felt calm and relaxed | 1 | | 2 | | | 3 | | 4 | | 5 | | 6 | |
| 33 | I felt energetic and active | 1 | | 2 | | | 3 | | 4 | | 5 | | 6 | |
| 34 | After waking up I felt vivid and rested | 1 | | 2 | | | 3 | | 4 | | 5 | | 6 | |
| 35 | my daily life was filled with things that interest me | 1 | | 2 | | | 3 | | 4 | | 5 | | 6 | |

***Thank you very much!***

**Survey guidelines**

**1. Evaluation of the survey results:**

- **Items 1 to** **8 measured on a 6-point Likert scale:**

*1 Strongly disagree; 2 Disagree; 3 Rather disagree; 4 Rather agree; 5 Agree; 6 Strongly agree.*

- **Items 9 to 27 are measured on a 6-point Likert scale:**

*1 At no time; 2 Sometimes; 3 Less than half the time; 4 More than half the time; 5 Most time; 6 All time.*

- **Items 28 to 30 are measured on a 2-point dichotomous scale:**

*1 Yes 2 No.*

- **Items 31 to 35 are measured on a 6-point Likert scale:**

*1 At no time; 2 Sometimes; 3 Less than half the time; 4 More than half the time; 5 Most time; 6 All time.*

**2. Items to be reversed:**

| *Items* | 19, 20, 21, 22, 25, 26 | 28, 29, 30 |
| --- | --- | --- |
| *Encoding* | 1=6 | 1=6 |
| 2=5 | 2=1 |
| 3=4 |  |
| 4=3 |  |
| 5=2 |  |
| 6=1 |  |

- The arithmetic average *(Mean)* of the corresponding items is used to determine the value of each well-being factor*.*

**3. Item grouping according to the factors:**

| *Factor* | *Factor constituent items* | *Number of items* |
| --- | --- | --- |
| 1. Subjective well-being | 1,11,18,31,32,33,34,35 | 8 |
| 1. Social inclusion | 2,3,4,8,15,16 | 6 |
| 1. Social support | 7,12,13,14,17,27 | 6 |
| 1. Meaningful job | 5,6,9,10 | 4 |
| 1. Job intensity | 21,22,25,26 | 4 |
| 1. Professional development | 28, 29, 30 | 3 |
| 1. Health risks | 19,20 | 2 |
| 1. Autonomy | 23, 24 | 2 |

**Factor definitions and item grouping according to the factors**

| *Factor* | *Definition* | *Reference* | *Item* |
| --- | --- | --- | --- |
| F1: Subjective well-being | A state of well-being in which an individual realizes their abilities, copes with everyday stress, works productively, and is able to contribute to society. It includes positive emotions, life satisfaction, and psychosocial functioning. | (Organization, 1998) | 31. In the last two weeks,  I was happy and in a good mood |
| 32. In the last two weeks, I have felt calm and relaxed |
| 33. In the last two weeks, I have felt energetic and active |
| 34. In the last two weeks, after waking up I felt vivid and rested |
| 35. In the last two weeks my daily life has been filled with things that interest me |
| 1. I am generally satisfied with my professional life |
| 11. How often do you feel that you are living a fulfilling life? |
| 18. How often do you feel your life is in balance (work and personal time)? |
| F2:  Inclusion | **Inclusion** ensures that all workers, regardless of gender, age, ethnic origin, disability, sexual orientation or other factors that could lead to discrimination, can participate fully in the work process and have equal opportunities for career development. It includes a working environment that supports diversity and provides equal opportunities in terms of access to resources, training, career opportunities and decision-making. | (OECD, 2017) | 2. I trust other people in our organisation |
| 3. I trust my line manager |
| 4. I am satisfied with the interpersonal communication at work |
| 8. I am generally satisfied with my work in this organisation |
| 15. How often do you feel supported by your colleagues? |
| 16. How often do you feel supported by your manager? |
| F3:  Social support | Formal and informal help that employees receive from colleagues, their manager or the organisation. This can take the form of emotional, informational or practical support that contributes to employees' well-being, emotional stability and professional development. | (OECD, 2017) | 7. My job offers good career opportunities |
| 12. How often do you feel involved in improving work processes in your organisation/team? |
| 13. How often do you feel that you can influence decisions that are important for your work? |
| 14. To what extent do you trust the top management of your organisation? |
| 17. How often do you learn something new in your work? |
| 27. How often do you receive recognition or praise for a job well done? |
| F4: Meaningful job | A meaningful job is one where employees perceive their work as purposeful, significant, and aligned with their personal values and goals, contributing to a sense of fulfillment and positive impact on others or society. It combines intrinsic motivation, the sense of contributing to a greater good, and alignment with one's individual purpose. | (OECD, 2017) | 5. My skills match my responsibilities |
| 6. My work makes a positive contribution to society |
| 9. How often do you feel that you are doing useful work? |
| 10. How often does this job give you the feeling of a job well done? |
| F5:  Job intensity | Work intensity is a job demand that refers to the level of effort, time pressure, and mental concentration required to perform work tasks. High work intensity, characterized by a fast work pace and sustained attention, requires continuous psychological and/or physical effort and is therefore associated with an increased risk of psychological strain and health problems. When not balanced by adequate job resources, high work intensity may contribute to stress, burnout, and decreased employee well-being.. | (Bakker & Demerouti, 2007) | 21. How often do you feel emotionally drained by your work? |
| 22. How often do you feel physically tired at the end of the working day? |
| 25. How often does your job require you to complete tasks under very tight, urgent deadlines? |
| 26. How often do you have to work fast at high speed? |
| F6: Professional development | Continuous development of the skills, knowledge and competences needed to succeed in the labour market. This includes both formal and informal training, such as seminars, courses, workshops, as well as day-to-day work experience and interaction with colleagues. | (Bakker & Demerouti, 2007) | 28. In the past year, I have received training paid for or provided by my employer |
| 29. In the last year, I have received training that improves my future job prospects |
| 30. In the last year, I have received training that has improved my skills |
| F7:  Health risks | A set of factors that adversely affect a person's health and well-being. These risks can range from external factors such as environmental pollution and working conditions to personal factors such as lifestyle, diet and physical activity levels. Health risks can contribute to the development of various diseases and health problems that affect people's quality of life and the economic costs to society. | (OECD, 2017) | 19. How often are you exposed to chemicals at work? |
| 20. How often are you exposed to noise at work? |
| F8: Autonomy | The ability of staff to make decisions and control their work independently of direct management direction. | (Bakker & Demerouti, 2008) | 23. How often can you choose your own working methods or change them as you see fit? |
| 24. How often can you choose or change the order of your tasks? |

**References**

Bakker, A. B., & Demerouti, E. (2007). The job demands‐resources model: State of the art. *Journal of managerial psychology*, *22*(3), 309-328.

Bakker, A. B., & Demerouti, E. (2008). Towards a model of work engagement. *Career development international*, *13*(3), 209-223.

OECD. (2017). *OECD Guidelines on Measuring the Quality of the Working Environment*. <https://doi.org/doi:https://doi.org/10.1787/9789264278240-en>

Organization, W. H. (1998). *Wellbeing measures in primary health care/the DepCare Project: report on a WHO meeting: Stockholm, Sweden, 12–13 February 1998*.
