# Supplementary material for: The multidimensional scale of subjective well-being of employed persons (MSWEP): validity and reliability
Source: Research Square preprint supplement (doi:10.21203/rs.3.rs-6838962/v1), 2025-07-17
Supplement: Supplementary file 2 [file 8b82732a808a0ddcdf9777f4.docx]

***Multidimensional scale of subjective well-being for employed persons (MSWEP)***

**This document includes the following information:**

1. Instructions for completing the questionnaire.

2. Questionnaire items.

**Survey guidelines:**

3. Evaluation of the survey results.

4. Factor definitions.

5. Item grouping according to the factors.

**PLEASE READ THE QUESTIONNAIRE INSTRUCTIONS FIRST**

The questionnaire contains statements about how people tend to feel in their day-to-day life at the workplace. Please tick one answer per line. Read each statement/question and rate how much you agree or disagree with each statement.

**Please indicate the extent to which you agree or disagree with the statements about your personal experience at work**

*Tick one answer per line*

| **1**  **Strongly disagree** | **2**  **Disagree** | **3**  **Rather disagree** | **4**  **Rather agree** | **5**  **Agree** | **6**  **Strongly agree** |
| --- | --- | --- | --- | --- | --- |

| 1 | My job offers good career opportunities | 1 | 2 | 3 | 4 | 5 | 6 |
| --- | --- | --- | --- | --- | --- | --- | --- |

**Please indicate how often you experience the following in the workplace**

*Tick one answer per line*

| **1**  **At no time** | **2**  **Sometimes** | **3**  **Less than half the time** | **4**  **More than half**  **the time** | **5**  **Most**  **time** | **6**  **All the time** |
| --- | --- | --- | --- | --- | --- |

| 2 | How often do you feel that you are living a fulfilling life? | 1 | 2 | 3 | 4 | 5 | 6 |
| --- | --- | --- | --- | --- | --- | --- | --- |
| 3 | How often do you feel involved in improving work processes in your organisation/team? | 1 | 2 | 3 | 4 | 5 | 6 |
| 4 | How often do you feel that you can influence decisions that are important for your work? | 1 | 2 | 3 | 4 | 5 | 6 |
| 5 | To what extent do you trust the top management of your organisation? | 1 | 2 | 3 | 4 | 5 | 6 |
| 6 | How often do you feel supported by your manager? | 1 | 2 | 3 | 4 | 5 | 6 |
| 7 | How often do you feel your life is in balance (work and personal time)? | 1 | 2 | 3 | 4 | 5 | 6 |
| 8 | How often are you exposed to chemicals at work? | 1 | 2 | 3 | 4 | 5 | 6 |
| 9 | How often are you exposed to noise at work? | 1 | 2 | 3 | 4 | 5 | 6 |
| 10 | How often do you feel emotionally drained by your work? | 1 | 2 | 3 | 4 | 5 | 6 |
| 11 | How often do you feel physically tired at the end of the working day? | 1 | 2 | 3 | 4 | 5 | 6 |
| 12 | How often can you choose your own working methods or change them as you see fit? | 1 | 2 | 3 | 4 | 5 | 6 |
| 13 | How often can you choose or change the order of your tasks? | 1 | 2 | 3 | 4 | 5 | 6 |
| 14 | How often do you have to work fast at high speed? | 1 | 2 | 3 | 4 | 5 | 6 |
| 15 | How often do you receive recognition or praise for a job well done? | 1 | 2 | 3 | 4 | 5 | 6 |

**Please indicate whether you have had any of the following experiences at work in the last year**

*Tick one answer per line*

| **1**  **Yes** | **2**  **No** |
| --- | --- |

| 16 | In the past year, I have received training paid for or provided by my employer | 1 | 2 |
| --- | --- | --- | --- |
| 17 | In the last year, I have received training that improves my future job prospects | 1 | 2 |
| 18 | In the last year, I have received training that has improved my skills | 1 | 2 |

**Please indicate how often you experience the following in the workplace**

*Tick one answer per line*

| **1**  **At no time** | **2**  **Sometimes** | **3**  **Less than half the time** | **4**  **More than half**  **the time** | **5**  **Most**  **time** | **6**  **All the time** |
| --- | --- | --- | --- | --- | --- |

| ***In the last two week...*** | | |  | |  |  | |  | |  | |  | |
| --- | --- | --- | --- | --- | --- | --- | --- | --- | --- | --- | --- | --- | --- |
| 19 | I was happy and in a good mood | 1 | | 2 | | | 3 | | 4 | | 5 | | 6 | |
| 20 | I felt calm and relaxed | 1 | | 2 | | | 3 | | 4 | | 5 | | 6 | |
| 21 | I felt energetic and active | 1 | | 2 | | | 3 | | 4 | | 5 | | 6 | |
| 22 | After waking up I felt vivid and rested | 1 | | 2 | | | 3 | | 4 | | 5 | | 6 | |
| 23 | My daily life was filled with things that interest me | 1 | | 2 | | | 3 | | 4 | | 5 | | 6 | |

***Thank you very much!***

**Survey guidelines**

**1. Evaluation of the survey results:**

- **Items 1** **measured on a 6-point Likert scale:**

*1 Strongly disagree; 2 Disagree; 3 Rather disagree; 4 Rather agree; 5 Agree; 6 Strongly agree.*

- **Items 2 to 15 are measured on a 6-point Likert scale:**

*1 At no time; 2 Sometimes; 3 Less than half the time; 4 More than half the time; 5 Most time; 6 All time.*

- **Items 16 to 18 are measured on a 2-point dichotomous scale:**

*1 Yes 2 No.*

- **Items 19 to 23 are measured on a 6-point Likert scale:**

*1 At no time; 2 Sometimes; 3 Less than half the time; 4 More than half the time; 5 Most time; 6 All time.*

**2. Items to be reversed:**

| ***Items*** | **8,9,10,11, 14** | **16,17,18** |
| --- | --- | --- |
| ***Encoding*** | 1=6 | 1=6 |
| 2=5 | 2=1 |
| 3=4 |  |
| 4=3 |  |
| 5=2 |  |
| 6=1 |  |

- The arithmetic average *(Mean)* of the corresponding items is used to determine the value of each well-being factor*.*

**3. Item grouping according to the factors:**

| ***Factor*** | ***Factor constituent items*** | ***Number of items*** |
| --- | --- | --- |
| 1. **Subjective well-being** | 2,7,19,20,21,22,23 | 7 |
| 1. **Social inclusion** | 1,3,4,5,6,15 | 6 |
| 1. **Professional development** | 16,17,18 | 3 |
| 1. **Job intensity** | 10,11,14 | 3 |
| 1. **Health risks** | 8,9 | 2 |
| 1. **Autonomy** | 12,13 | 2 |
